1 **RESEARCH ARTICLE**

2 **Title**

3 **Mimicking orchids lure bees from afar with exaggerated ultraviolet**  
4 **signals**

5

6 **Authors**

7 Daniela Scaccabarozzi<sup>1,2\*</sup>, Klaus Lunau<sup>3</sup>, Lorenzo Guzzetti<sup>4</sup>, Salvatore Cozzolino<sup>5</sup>, Adrian G.  
8 Dyer<sup>6,7</sup>, Nicola Tommasi<sup>4</sup>, Paolo Biella<sup>4</sup>, Andrea Galimberti<sup>4</sup>, Massimo Labra<sup>4</sup>, Iliaria Bruni<sup>4</sup>,  
9 Lorenzo Pecoraro<sup>2</sup>, Giorgio Pattarini<sup>8</sup>, Mark Brundrett<sup>9</sup>, Monica Gagliano<sup>10,11</sup>

10 **Affiliations**

11 <sup>1</sup> School of Pharmaceutical Science and Technology, Tianjin University, Tianjin,  
12 300072, China

13 <sup>2</sup> School of Molecular and Life Sciences, Curtin University, Bentley, WA 6102,  
14 Australia

15 <sup>3</sup> Institute of Sensory Ecology, Heinrich-Heine University Düsseldorf, 40225, Germany

16 <sup>4</sup> ZooPlantLab, Dipartimento di Biotecnologie e Bioscienze, University of Milano - Bicocca, Milan,  
17 20126, Italy

18 <sup>5</sup> Department of Biology, University of Naples Federico II, Naples, 80126, Italy.

19 <sup>6</sup> Bio-Inspired Digital Sensing Lab, School of Media and Communication, RMIT University,  
20 Melbourne, VIC 3001, Australia

21 <sup>7</sup> Department of Physiology and Neuroscience Program, Biomedicine Discovery Institute, Monash  
22 University, Clayton, VIC 3800, Australia

23 <sup>8</sup> Department of Mathematics and Physics, University of Stavanger, Stavanger, 402, Norway

24 <sup>9</sup> School of Biological Sciences, University of Western Australia, Perth, WA 6009, Australia

25 <sup>10</sup> Biological Intelligence (BI) Lab, Faculty of Sciences & Engineering,  
26 Southern Cross University, Lismore, NSW 2480, Australia

27 <sup>11</sup> Sydney Environment Institute (SEI), The University of Sydney, Camperdown,  
28 NSW 3260, Australia

29 **\*Corresponding author:** Daniela Scaccabarozzi

30 **Email:** [daniela.scaccabarozzi@curtin.edu.au](mailto:daniela.scaccabarozzi@curtin.edu.au)

31

## 32 **Acknowledgments**

33 We thank A. Aromatisi for fieldwork assistance and useful discussions on the study design. We  
34 acknowledge C. Best for fieldwork assistance, T. Houston for input in the behavioural ecology of  
35 native bees, T. Scalzo, P. Chapman, M. Massi and C. May for technical and laboratory assistance.

36 We acknowledge the following funding sources: Endeavour Fellowship Program grant ID  
37 5117\_2016 (DS); Australian Orchid Foundation grant 308.16 (DS); Curtin University grant  
38 CIPRS-CSIRS\_2017 (DS); Università degli Studi di Napoli Federico II, Short mobility program  
39 D.M. 976\_2017 (DS); Templeton World Charity Foundation grant TWCF0541 (MG); Australian  
40 Research Council Discovery Project DP160100161 (AGD).

41

## 42 **Conflict of interest**

43 Authors declare no competing interests.

## 44 **Author contributions**

45 DS, SC, MG, KL, AGD conceived the ideas and designed methodology; DS, MB, AG collected the data;  
46 LG, DS, AG, SC, AGD analysed the data; DS, MG, KL, SC led the writing of the manuscript. All authors  
47 contributed critically to the drafts and gave final approval for publication.

## 48 **Data availability statement**

49 Data needed to evaluate the conclusions in the paper are presented in the Supplementary Information.

50

51

52

53

54 **Abstract**

55 1. Flowers have many sensory traits to appeal to pollinators, including ultraviolet (UV) absorbing markings,  
56 which are well known for attracting bees at close proximity (e.g. < 1 m). While striking UV signals have  
57 been thought to attract pollinators also at greater distances of meters, how the signals impact the plant  
58 pollination success over distance remains unknown. Here we report the case of the Australian orchid  
59 *Diuris brumalis*, a non-rewarding species, pollinated by bees via mimicry of rewarding pea plant *Daviesia*  
60 *decurrens*. When distant from the pea plant, *Diuris brumalis* was hypothesized to enhance pollinator  
61 attraction by exaggerately mimicking the floral ultraviolet (UV) reflecting patterns of its model.

62 2. By experimentally modulating floral UV reflectance with a UV screening solution, we quantified the  
63 orchid pollination success at variable distance from the model plants.

64 3. We demonstrate that the deceptive orchid *Diuris brumalis* attracts bee pollinators by emphasizing the  
65 visual stimuli, which mimic the floral UV signalling of the rewarding model *D. decurrens*. Moreover, the  
66 exaggerated UV reflectance of *D. brumalis* flowers impacted pollinators' visitation at an optimal distance  
67 from *D. decurrens*, and the effect decreased when orchids were too close or too far away from the model.

68 4. Our findings show that salient UV flower signalling plays a functional role in visual floral mimicry, likely  
69 exploiting perceptual gaps in bee neural coding, and mediates the plant pollination success at much  
70 greater spatial scales than previously expected.

71

72 **Keywords:** ecological interactions, flower attraction, bee sensory ecology, visual food deception, orchid  
73 floral mimicry, pollination success, salient stimuli, ultraviolet reflectance

74

75

76 **1. Introduction**

77 The art of deception, involving a range of strategies individuals adopt to change the perception and  
78 behaviour of others, is commonly practiced by many organisms across the animal and plant kingdoms.

79 Mimicry, a form of deception, allows individuals to conceal their identity and avoid recognition by (more or  
80 less) closely imitating the behaviour or resembling the appearance of their models (Dawkins & Krebs,  
81 1979). One of the most remarkable examples of these deceptive adaptations is the duping of pollinating

82 animals by plant mimics. Amongst the 32 families of deceptive plants (Renner, 2006), orchids are

83 undoubtedly the master tricksters. With an estimate of about one-third of all species lacking floral reward to  
84 pollinators (Dafni, 1984; Ackerman, 1986a; Jersáková et al., 2006), orchids deceive by luring food-seeking

85 animals by fine-tuned mimicry (i.e. Batesian floral mimicry) or general, even inaccurate, resemblance of  
86 rewarding flowers (e.g. generalized food deception; Shretha et al., 2020). Surprisingly, how plants succeed  
87 in their deception despite widespread imperfect mimicry remains poorly understood (Roy & Widmer, 1999;  
88 Schiestl, 2005; Vereecken & Schiestl, 2008). In animals, the success of imperfect mimicry has been  
89 explained by high-salience traits, which overshadow other 'less important' traits (Cuthill, 2014; Kazemi et  
90 al., 2014) by being highly discriminable from the background (Frieman & Reilly, 2015). Although high-  
91 salience signals such as attention-grabbing colours and visual patterns occur as frequently in animals  
92 (Kazemi et al., 2014) as in plants (Peter & Johnson, 2008; Jersáková et al., 2012; Peter & Johnson, 2013),  
93 their role in explaining imperfect mimicry in plants has received comparatively less attention (Vereecken &  
94 Schiestl, 2008). In this study, we examined the role salient ultraviolet (UV) signalling plays in the imperfect  
95 floral mimicry of a rewardless orchid that falsely advertises a reward to attract bees when afar from model  
96 plants.

97 Flowering plants and pollinating insects interact through a wide range of sensory modalities which affect  
98 both the pollinator's foraging behaviour and the plant's reproductive success (Leonard et al., 2011a;  
99 Glover, 2011). Pollinating insects, in particular bees, make their foraging decisions most effectively by  
100 combining visual, olfactory and somatosensory floral signals (Leonard et al., 2011a; Kulahci et al., 2008),  
101 yet their innate preference for conspicuous floral displays makes colour and contrasting visual patterns the  
102 primary means by which plants first attract them (Naug & Arathi, 2007; van der Kooi et al., 2019). Bees,  
103 the main flower visitors, have phylogenetically conserved trichromatic vision (Briscoe & Chittka, 2001)  
104 which can be conveniently modelled with maximum sensitivity UV (approx. 340 nm), Blue (435 nm) and  
105 Green (560 nm) photoreceptors (Chittka & Kevan, 2005). Plants produce striking floral markings and  
106 patterns by absorbing and reflecting UV light (Briscoe & Chittka, 2001; Dinkel & Lunau, 2001; Lunau et al.,  
107 2006; Papiorek et al., 2016; Lunau et al., 2021). Interestingly, it is the UV reflectance display rather than  
108 UV pattern (absorbance and reflectance) that increases insect visitation (Johnson & Andersson, 2002;  
109 Klomberg et al., 2019). The high chromatic contrast that such UV signals can generate is thought to  
110 enhance colour salience in an opponent colour system (Lunau et al., 2006; Papiorek et al., 2016; Chittka  
111 et al., 2001); however, such chromatic contrast is assumed to work only at relatively short distances of  
112 about few centimetres (e.g. UV absorbing "floral guides"; Giurfa et al., 1996; Garcia et al., 2001; Horth et  
113 al., 2014; Orbán & Plowright, 2014). This is because bees typically only use the long wavelength green  
114 input channel of their visual system to enable fast achromatic processing and detection of small target  
115 signals (Klomberg et al., 2019), although some psychophysics shows that alternative chromatic channels

116 may in some cases also be important for bee detection and recognition (Zhang et al., 1995; Morawetz et  
117 al., 2013; Dyer et al., 2019). That UV reflectance can also attract pollinator insects from further afield has  
118 been posited for decades (Daumer, 1956; Daumer, 1958; Burr et al., 1995; Koski & Ashman, 2014) but  
119 remains unverified.

120 Salient UV signals against the background may be particularly relevant for increasing long distance  
121 attractiveness in plants that employ flower mimicry (Dyer, 1996). One such plant is the Australian donkey  
122 orchid *Diuris brumalis* whose outer petals appear yellow to human vision, and also reflect large amounts of  
123 UV that would be conspicuous to the visual system of bees (Burr et al., 1995). *Diuris brumalis* is a food-  
124 deceptive species which secures pollination by resembling the co-occurring rewarding pea plant *Daviesia*  
125 *decurrens* (Scaccabarozzi et al., 2018). The mimicry signals consist of both colour reflectance and inner  
126 flower shape, as the outer petals diverge from the pea flower shape (Scaccabarozzi et al., 2018). In  
127 addition, the size of the orchid flower is about three times bigger than the pea flower (Fig. 1 a). Whilst the  
128 mimicry in size and shape is imperfect, the orchid coloration, with the average colour loci corresponding to  
129 the UV region, is perceptually similar to the pea model in colour space; such overlap (< 0.06 colour  
130 hexagon units) makes the two species not readily distinguishable in the eyes of their bee pollinator,  
131 *Trichocolletes* spp. (Hymenoptera: Collectidae, Fig 1a; Scaccabarozzi et al., 2018). Food-deceptive  
132 orchids are known for gaining their pollination success not only by resembling a specific rewarding model  
133 flower (Scaccabarozzi et al., 2018; Schaefer & Ruxton, 2009; Dyer et al., 2012), but also exaggerating their  
134 floral signals that advertise the false reward and thus increase pollinator responses (Ackerman, 1996b).

135 We hypothesized that the two UV reflecting outer petals of *Diuris* function as exaggerated version (for UV  
136 reflectance display) of the floral signal display *Trichocolletes* bees normally encounter in the rewarding  
137 *Daviesia* peas. We expected that modulating the *Diuris* exaggerated UV signals over a spatial scale does  
138 affect pollination success when orchids are relatively distant from their model food plants because  
139 pollinators are more likely to mistake the orchid for the rewarding model when afar. Here we report that the  
140 orchid not only uses exaggerated UV reflectance to falsely advertise a potential reward to attract bees from  
141 afar, but the ruse works most effectively at an optimal distance of several meters revealing the functional  
142 role of salient visual stimuli when mimicry is imperfect.

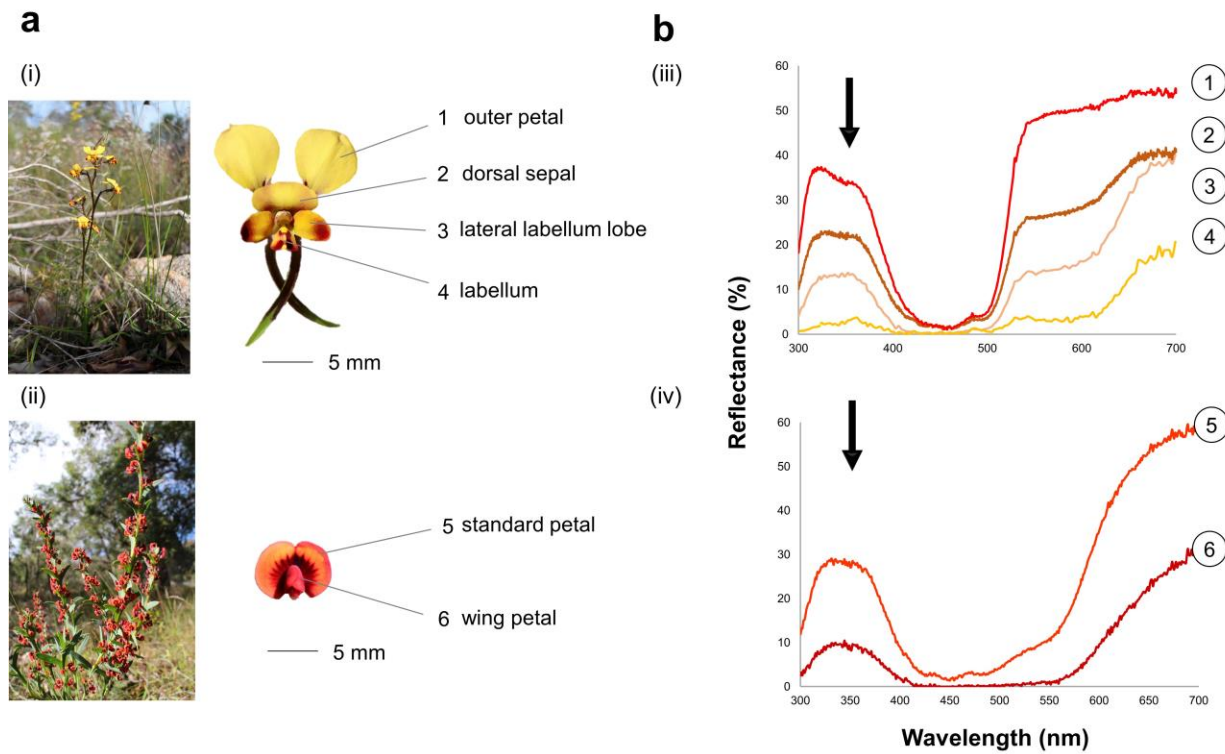

143

## 144 2. Materials and Methods

145 **Study system.** Endemic to Western Australia, the orchid *Diuris brumalis* produces yellow–brown  
146 nectarless flowers between July and August and is pollinated via mimicry of rewarding pea plants  
147 (*Daviesia* spp.) by *Trichocolletes* (Colletidae) native bees (Scaccabarozzi et al., 2018). *Trichocolletes* is a  
148 genus of solitary bees that are specialist and speed (visits last less than two seconds) feeder on pea  
149 flowers and displaying a distinctive and identical behaviour on both orchids and peas, confirming that it is  
150 successfully deceived. The orchid mimics the papilionaceous flower typical of the pea model and while the  
151 visible spectrum differs between the mimic and model flower, they are likely to look similar through a bee  
152 visual model (Scaccabarozzi et al., 2018). However, the orchid flower diverges from the pea flower  
153 structure for exhibiting two prominent outer petals.

154 We carried out our study in *Diuris brumalis* populations spread along the Darling Range in Western  
155 Australia during 2018, 2019 and 2020 (Table S1). *In situ* studies and experimental setting were preferred

156 as the orchids are protected by national regulation and their withdrawal is only allowed for few biological  
157 material.

158

159 **Floral morphology and colour properties.** To test the hypothesis that the two outer petals of *Diuris* may  
160 function as an exaggerated version of *Daviesia* floral signals, we determined whether the orchid outer  
161 petals had the highest UV reflectance, so amplifying the UV reflectance of the pea model. Firstly, we  
162 determined whether the outer petals were the component of the *Diuris* flower with the highest UV spectral  
163 reflectance. We obtained UV measurements for each floral component (n = 6 flowers) for both species  
164 using a Cary 4000 UV-Vis spectrophotometer (Agilent Technologies, CA) and calculating the average  
165 spectral reflectance for each floral part.

166 Secondly, we measured the size of the flower components of the flower in 10 plants of both *Diuris* and  
167 *Daviesia* (Fig. S1; Data source S1). We obtained for both species a UV salient signal ratio according to cut  
168 value of Australian flowers following Dyer (1996) (see Data source S1). Flower components' area were  
169 estimated as follows: as flowers of *Diuris* and *Daviesia* show minimal concavity or convexity, the area of  
170 the outer and central component of *Diuris* were estimated by approximating the components to the closest  
171 geometric figures, the ellipse (orange) and the circle (green), respectively (Fig. S1). *Daviesia* standard  
172 petals' area was approximated to an ellipse, to which was subtracted a secondary minor ellipse  
173 circumscribing the wing and keel petals (Fig. S1; Data source S1).

174 To quantify the contrast of the respective flower signals we used the bee visual parameters according to  
175 Chittka and Kevan (2005) and neural coding that enable converting visual signals sensed by each receptor  
176 channel into Excitation values between 0 and 1.0. The visual system was adapted to foliage background  
177 with a biologically relevant neural resting Excitation value of 0.5 and a contrast of zero (Chittka et al., 1994;  
178 Spaethe et al., 2001). This model enables the calculation of absolute contrast values ranging from 0 to 0.5  
179 (maximum contrast) for any stimulus that is different to the background as perceived by the visual system  
180 of bees (Table 1).

181 False colour photography in 'bee view' format was used to reveal the overall colour pattern perceived by  
182 bees of *Diuris* and *Daviesia* flowers (Fig. 2 a, Fig. 2b; see Methods S3 in Supporting Information).

183 Spectrometer measurements of flower components of *Diuris* and *Daviesia* were converted according to the

184 established bee visual model (Chittka, 1992). Location of colour loci was calculated as from mean of  
185 reflectance for floral parts of *Diuris brumalis*, and *Daviesia decurrens* (Fig. 2 c).

186 **Model-mimic distance experiment.** To test whether *Diuris* pollination success varies depending on the  
187 distance to the model pea plants, in 2019 we first quantified distance between an individual orchid and all  
188 the surrounding pea models within a quadrat of 30 x 30 m centred on a single orchid plant (N = 122  
189 orchids across 5 populations; Fig. S2) for all orchid plants per population. As a result, all quadrats were  
190 overlapped within the same population, but not among populations (as distance between population was  
191 greater than 500 m). To quantify pollination attraction, we recorded the number of pollinaria removed by  
192 pollinators in all orchids per population, counting the number of flowers in both orchids and pea plants  
193 (pollinia removed in orchids were counted by visually observing the lack of pollinia at the top of the  
194 column). We analysed the distance data by using a Generalized Mixed Effect Model (GLMM) with Poisson  
195 distribution. The response variable in the model was the number of pollinaria removed and the fixed effects  
196 were the distance from the pea model and the number of orchid flowers. Population was treated as  
197 random factor, since it was found to be significant in influencing the number of pollinaria removed. The  
198 model was evaluated for its dispersion parameter and residuals were evaluated for the assumption of  
199 overdispersion and homoscedasticity.

200 **Ultraviolet manipulations experiments.** Subsequent manipulation experiments were carried out in field  
201 in 2019 and 2020 by screening the UV properties of the two *Diuris* outer petals with an UV filter solution  
202 (see Johnson & Andersson, 2002; Peter & Johnson, 2013), which effectively eliminates UV reflectance  
203 whilst transmitting all wavelengths above 400 nm (Fig. 2 a, Fig. 2 b i.e., UV filter). To confirm that treated  
204 *Diuris* outer petals did not excite the UV bee photoreceptor as untreated petals and *Daviesia* petals did, we  
205 analysed the spectral reflectance measurements for the different floral component using the model of bee



206 vision including treated petals (Chittka, 1992; Table 1). False colour photography in 'bee view' format was  
207 applied on *Diuris* flower with treated outer petals to show the overall colour pattern (Fig. 2 b).

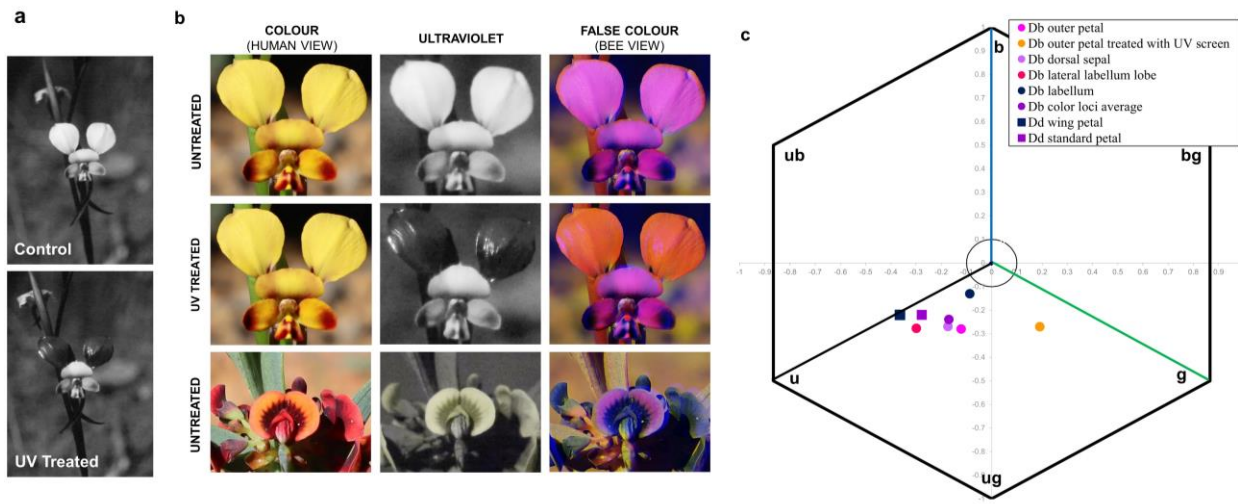

208

209 **Fig. 2. Colour patterns perceived by bees in treated and untreated *Diuris* flowers and untreated**  
210 ***Daviesia*.** (a) *Diuris* flower photographed in UV before (control, C) and after applying the UV absorbant  
211 filter on the outer petals (UV treated, T). (b) False colour photography in 'bee view' reveals the overall  
212 colour pattern perceived by bees in treated (i.e., application of the UV filter solution) and untreated outer  
213 petals of *Diuris* flower and untreated *Daviesia* flower. The UV filter is effectively a long pass filter  
214 transmitting all wavelengths above 400 nm, free of fragrance, oil, PABA, alcohol, parabens and  
215 preservatives (Kinesys, Canada). Importantly, the UV images of treated outer petals show very similar  
216 reflectance properties to the background and stem foliage reflectance, confirming that the experimental  
217 manipulation knocked out UV signalling with respect to background colouration. (c) Location of colour loci  
218 was calculated as from mean of reflectance for floral parts of *Diuris brumalis* (Db), and *Daviesia decurrens*  
219 (Dd). The calculations were made using the Hexagon colour model of bee vision (Chittka, 1992). This  
220 model represents the internal perception of flower colours by bee pollinators, and resultant sectors [u  
221 (ultraviolet); ub (ultraviolet-blue); b (blue) bg (blue-green); g (green); ug (ultraviolet-green)] show how bees  
222 likely interpret spectral signals].

223 In the first field manipulation experiment (in 2019), we tested the hypothesis that UV reflectance enhances  
224 orchid pollination success (pollen removal) only when orchids are out of patch of model pea plants. We  
225 quantified the number of pollinaria removed from *Diuris* flowers by free-foraging bees when the mimicking  
226 orchid occurred inside [IN] and outside [OUT] the 30 x 30 m patch of model plants (within a maximum

227 distance of 10 meters from the patch; Fig. 3a). The patch size encompassed most orchid plants belonging  
228 to an individual population according to former studies on pollination success of *Diuris* at this location  
229 (Scaccabarozzi et al., 2018). Over a 4-day period, all orchids in both [IN] and [OUT] groups (N = 400  
230 across 5 populations, Table S1) were treated with the UV filter. Within each group, a randomly selected  
231 half of the orchids was sprayed on the front and back of the two outer petals (treatment, T) and the other  
232 half of the orchids at the base of the corolla (control, C). Number of flowers was standardised in each  
233 group by removing exceeding flowers. The filter was applied before the daily peak of bee activity and left  
234 for 3 hours (corresponding to the filter persistence on petals) from 11.00 am to 1.00 pm and the number of  
235 pollinia removed from the orchids within each group was recorded during the subsequent two-hour period  
236 (1.00 to 3.00 pm). Prior to the filter application, the treated and untreated plants were numbered and  
237 tagged. We also recorded the number of pollinia already removed per flower / per plant to make sure of the  
238 net counting of pollinia. When revisiting the plants for scoring pollinia, we checked the plants in the same  
239 order followed prior to the treatment. Statistics were based on comparisons of removed pollinia between  
240 experimental groups (UV-treated petals) and control groups (UV-untreated petals).

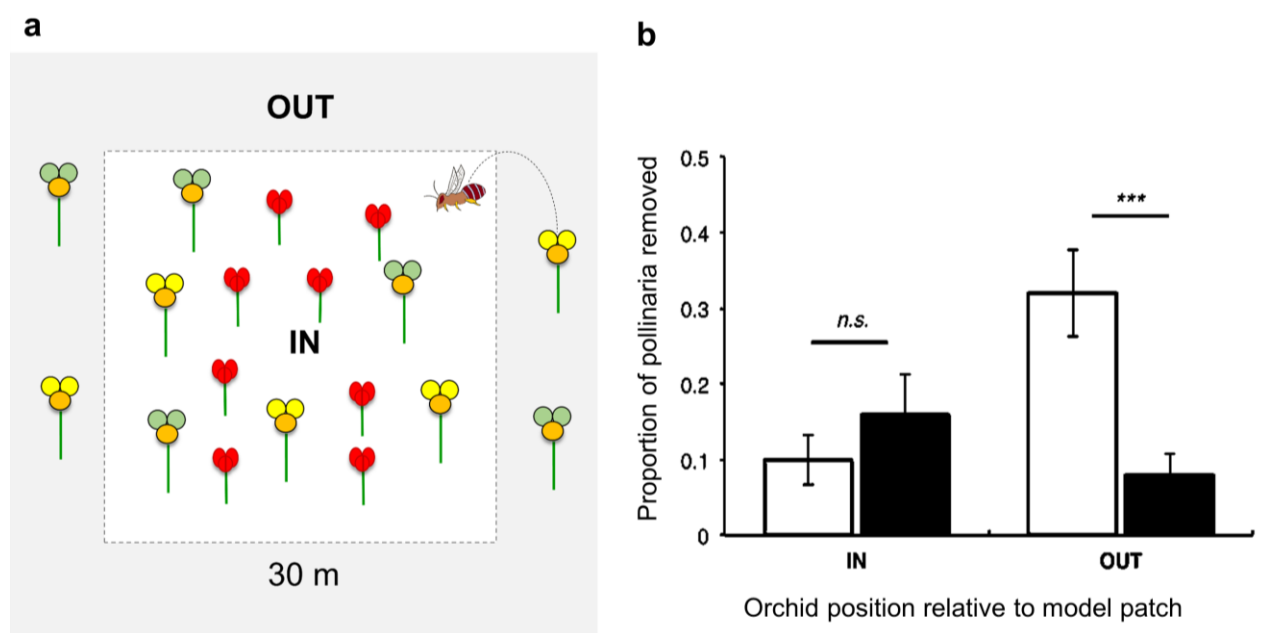

**Fig. 3. Effect of distance from model plants on *Diuris* pollination success.** (a) *Diuris* orchids (yellow [untreated] and green [UV treated] flowers) inside [IN] and outside [OUT] a 30 x 30 m patch with *Daviesia* pea (red flowers). (b) Mean proportion of pollinia bees removed from treated (black bars; T) and untreated *Diuris* flowers (white bars; C) relative to the orchid's distance ([IN] and [OUT]) from the model pea. Each experimental group consists of N = 100 orchids. Error bars are 95% confidence intervals; *n.s.*

248 no significant difference among experimental groups; \*\*\*significant difference at Bonferroni corrected  $\alpha =$   
249 0.0125.

250 In the second field manipulation experiment (in 2020), we tested the hypothesis that by displaying an  
251 exaggerated version of *Daviesia*'s attractive UV reflectance, *Diuris* benefits from pollinators that mistake it  
252 for the rewarding model from afar. We quantified pollinaria removal within 63 orchid groups randomly  
253 selected across three large orchid populations (Table S1, Populations 1, 2,3). Each orchid group consisted  
254 of two orchid clumps, each containing between 2 and 12 plants. Each orchid clump was selected to be at  
255 approximately the same distance from a model pea plant (from 0 to 15 m) at a variable angle from the pea  
256 plant (Fig. 4a).

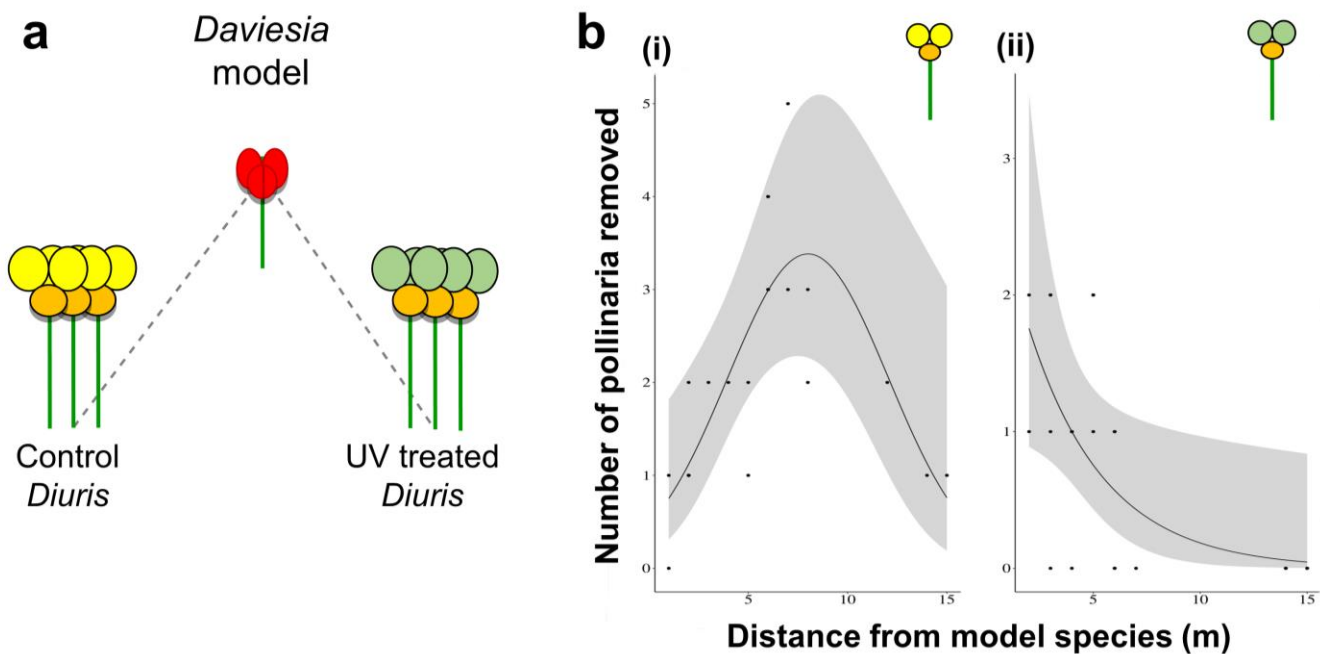

257  
258 **Fig. 4. Effect of *Diuris* UV reflectance on the orchid's pollination success relative to mimic-model**  
259 **distance.** (a) Experimental set up treated, untreated orchid groups and pea plants, (b) Pollinaria removal  
260 was quantified in 195 orchids (N = 476 orchid flowers). Pollination success of control *Diuris* relative to  
261 distance from *Daviesia* (i) was best described by an inverted parabolic function peaking at ~8 m distance  
262 from model pea ( $\chi^2=9.87$ ,  $p < 0.05$  for the squared and linear term respectively) (N=238 flowers, n =43  
263 pollinia removed). Pollination success of UV treated orchids (ii) exhibited an exponential decrease with  
264 distance from model pea plants ( $\chi^2=10.26$ ,  $p < 0.001$ ); (N=238 orchid flowers, n =17 pollinia removed).  
265 Refer to Data source S7 for full data.

266 Within each orchid group, *Diuris* floral display (i.e., number of flowers in each clump) was standardized by  
267 removing excess flowers. Within each group, the UV filter solution was sprayed on the outer petals of one  
268 clump (treatment, T) and at the base of the corolla on the other clump (control, C) as in the previous  
269 experiment (same treatment and plant visitation timing). Prior to the UV filter application, the treated and  
270 untreated plants were numbered, tagged and the number of pollinia removed per flower / per plant was  
271 recorded. Pea plant flowers range was uniform among plants at the time of experiment. The number of  
272 pollinaria removed from the UV treated and control orchids within each group was recorded as a function  
273 of of the orchid's distance to the pea plant and was modelled by a Poisson GLMM (appropriate for count  
274 data) with a fixed effect for treatment.

275

### 276 **3. Results**

277

#### 278 *Outer petals in the mimic orchid display an exaggerated UV signal of model plants*

279

280 Spectral reflectance and morphological measurements of flowers components confirmed that *Diuris*  
281 functioned as an exaggerated version of the floral signals bees normally encounter in the rewarding  
282 *Daviesia* peas. The outer petals proved to be both the largest component of the orchid flower and the area  
283 with the highest UV reflectance (Fig. 1b; Fig S1, Data source S1). *Diuris* flowers produced an overall  
284 higher UV salient signal ratio (ratio=0.84) comparing to *Daviesia* flowers (ratio=0.69; Data source S1)  
285 representing a 22% increase of surface area reflecting UV signal (Data source S1). The strength of the UV  
286 signalling in *Diuris* had a contrast value of 0.34 which is 26% greater than the UV channel contrast value of  
287 0.27 in *Daviesia* standard petals (Table 1). False colour photography in 'bee view' revealed the similarity of  
288 the overall colour pattern perceived by bees of *Diuris* and *Daviesia* flowers (Fig. 2 b).

289 According to the colour model, petals of *Diuris* and petals of *Daviesia* are located in the bee perceived "ug"  
290 (UV-green) and "u" (ultraviolet) sectors of the Hexagon colour space related to the excitation of bee  
291 photoreceptors and subsequent bee neural coding of information (Fig. 2 c; Table 1) (Chittka, 1992; Chittka  
292 et al., 1994).

293

294

295 *Orchid pollination success relate to mimic-model distance*

296

297 Mimic-model distance on large scale revealed that the number of pollinaria removed from the orchid  
298 flowers decreased significantly with distance between orchid and pea (Fig. S2). Specifically, pollination  
299 success decreased significantly with the square of orchids' distance from the pea model ( $\chi^2=17.09$ ,  $p <$   
300  $0.001$ ) and was compromised when the distance between orchid and pea was greater than 15 m ( $\chi^2=9.49$ ,  
301  $p = 0.002$ ).

302

303 *The exaggerated UV signal enhances the orchid success relative to model plants*

304

305 Field manipulation experiments showed that the exaggerated UV signal of *Diuris* outer petals enhances  
306 the orchid's pollination success. The UV filter treatment had no attracting or repelling effect on the  
307 pollinators (see Methods S1 in Supporting Information).

308 Treated petals of *Diuris brumalis* are located in the bee perceived "g" (green) Hexagon sector and did not  
309 excite bee UV photoreceptors (Fig. 2 c; Table 1). Secondly, the colour model confirmed that excitation of  
310 Green receptor, which is known to be important for how bees efficiently find flowers (Giurfa et al., 1996;  
311 Skorupski & Chittka, 2010; Garcia et al., 2021), was not affected by UV filter treatment (Table 1). False  
312 colour photography in 'bee view' confirmed that the UV filter knocked out UV signalling with respect to  
313 background colouration (Fig. 2 b).

314 In the first field manipulation experiment, we quantified the number of pollinaria removed from treated and  
315 control *Diuris* flowers by free-foraging bees when the mimicking orchid co-occurred with the model pea  
316 within a 30 x 30-m patch per orchid population [IN] and when the mimics occurred outside the patch of  
317 model plants [OUT] (Fig. 3a). The application of the UV filter on the two outer petals resulted in a  
318 significant effect on the number of pollinaria removed by bees from the orchid flowers ( $\chi^2=19.81$ ,  $p <$   
319  $0.001$ ). There was no difference in the pollination success of *Diuris* whose outer petals had been treated  
320 with the UV filter [IN-T] compared to untreated control orchids [IN-C] inside the patches of model plants (Fig.  
321 3b). Outside the patches of model plants, however, orchids with UV-filter treatment [OUT-T] experienced  
322 significantly lower pollinaria removal than control ones [OUT-C] (Fig. 3b).

323 In the second field manipulation experiment, we found that pollination success of control *Diuris* increased  
324 with distance by peaking at ~8 m away from the model peas before declining and becoming ineffectual at  
325 distances greater than 15 m (Fig. 4bi). We detected no effect of UV reflectance on *Diuris* pollination  
326 success when the orchids were closer than a few meters to their model pea plants (Fig. 4bi, Fig. 4bii).

327

#### 328 **4. Discussion**

329 Our results establish that *Diuris* orchids mimic and exaggerate *Daviesia*'s attractive floral signals in terms  
330 of UV reflectance, display, and contrast as perceived by bee pollinators. Flowers that reflect greater than  
331 10% UV radiation, like *Diuris* and *Daviesia*, are shown to have evolved this salient trait to improve  
332 communication with bees since most organic background material like leaf foliage has very low UV  
333 reflectance (Dyer, 1993; Chittka et al., 1994; Spaethe et al., 2001; van der Kooi et al., 2019).

334 By masking the UV reflectance in half of the orchids inside the *Daviesia*'s patch, the treatment effectively  
335 made those *Diuris* displaying the exaggerated UV signal a rarer phenotype, which would be predicted to  
336 enjoy greater pollination success by negative frequency-dependent selection (Schiestl, 2005; Schiestl &  
337 Johnson, 2013). Instead, there was no difference in the pollination success of *Diuris* whose outer petals  
338 had been UV screened [IN-T] compared to untreated control orchids [IN-C] inside the *Daviesia*'s patch  
339 (Fig. 3b). At closer range, within pea patch, bees apparently recognise plants by spotting other visual traits  
340 as the shape of *Diuris* two outer petals. For example, a colour trait may become less effective in ensuring  
341 successful mimicry when other secondary traits such as size and shape of the flowers can be better  
342 discriminated (Gigord et al., 2002; Johnson et al., 2006). Outside the model patch, however, orchids with  
343 UV-filter treatment [OUT-T] experienced substantially lower pollinaria removal than control ones [OUT-C]  
344 (Fig. 3b), due to a lack of the salient signal which is associated to the model trait. Thus, the exaggerated  
345 UV signal produced by *Diuris* outer petals only increased the orchid's pollination success when the mimic  
346 was further away from its models' patch. Our findings demonstrate that salient floral UV reflectance plays  
347 a critical role in ensuring *Diuris* pollination success and explain why the exaggerated UV signal is  
348 strategically relevant in floral mimicry when the model is not very close to the mimic. According to previous  
349 theories predicting the effectiveness of the mimic's floral stimuli to decline with distance from its model  
350 (Johnson & Schiestl, 2016; Duffy & Johnson, 2017), we also found that the number of pollinaria removed

351 from the orchid flowers decreased significantly with distance between orchid and pea (Fig. S2). However,  
352 the strength and direction of this effect may vary across different spatial scales and conclusions about the  
353 importance of floral stimuli will depend on the scales at which studies are undertaken. For example, by  
354 examining the mimic-model effect at considerably smaller spatial scales than usually investigated (i.e.,  
355 tens to hundreds of meters) (Duffy & Johnson, 2017; Johnson et al., 2003; Peter & Johnson, 2008), our  
356 results show that the exaggerated UV reflectance of *Diuris* outer petals function to enhance pollination at  
357 an optimal model-mimic range of ~8 m. *Diuris* outer petals might promote pollinator deception via bee  
358 cognitive misclassification (Dyer et al, 2012; Johnson & Schiestl, 2016), displaying colour frequencies  
359 below the optimal range of colour discriminations in hymenopteran (i.e. 400-500 nm) (Peitsch et al., 1992),  
360 especially for free-flying honeybees (von Helversen, 1972; Rohde et al., 2013).

361 But why might the observed distance range from model species be optimal? To understand this question,  
362 we must delve into both the neurophysiology and physiology of how bee pollinators perceive their world.  
363 When a bee receives sweet tasting nectar reward from a rewarding plant like *Daviesia decurrens*, this  
364 promotes a sustained positive neural response via the ventral unpaired median (VUM) neurons that permit  
365 an association between flower and reward with a sustained spiking response of about 15s (Hammer, 1993;  
366 Perry, 2013), and can enable simple associative learning of colour information (Dyer & Chittka, 2004;  
367 Giurfa, 2004). It is also known that precise colour memory in both bees and humans requires simultaneous  
368 viewing conditions that decay in less than a second once a target model is no longer in view (Uchikawa &  
369 Ikeda, 1981; Dyer & Neumeyer, 2005); therefore, being close to a model species might allow a bee to  
370 identify potential differences that unmask the deception (von Helversen, 1972). Given that bees may fly up  
371 to about 7 m in a second (Spaethe et al., 2001; Srinivasan & Lehrer, 1985), we hypothesize the 8 m  
372 distance we observed for optimal pollination success is beyond the theoretical upper limit where precise  
373 colour vision operates; at such distances, the bee has to recall from memory what it thought was rewarding  
374 and tends to prefer a slightly more salient comparative stimulus, an effect related to peak shift  
375 discrimination (Lynn et al., 2005; Leonard et al., 2011b; Martínez-Harms et al., 2014). The fast visits of  
376 *Trichocolletes* bees on both model and mimic flowers (Scaccabarozzi et al., 2018), suggest that *Diuris*  
377 benefits from foraging speed behaviour that unfavours the accuracy of bee choices (Chittka et al., 2003).  
378 Thus, we propose that orchids like *Diuris* master deception by employing both exaggerated signalling and  
379 by exploiting the perceptual gaps in pollinators' visual processing.

380 Our results also highlight that we gain a very different understanding of the relative role of floral signals if  
381 we work at one scale over another and consider the dynamics of pollinator perception. For example, orchid  
382 pollination success was greatest when the mimics were further away from their models (e.g. outside the  
383 patch), but within a maximum distance of 10 meters from the model patch. Because the pollination  
384 success of deceptive species can be subject to both competition and facilitation effects depending on the  
385 density of rewarding (Julliet et al., 2007) and conspecific plants (Duffy & Stout, 2011) the competition  
386 orchids experienced within the patch of floriferous pea plants would have been at its strongest (Fig. 3b).  
387 However when we accounted for both floral density of conspecific and model plants along a continuous  
388 and wider spatial scale (Fig. S2), the pollination success pronouncedly declined at distances greater than  
389 15 m from model plants. At such distances, the orchids no longer had to contend with the peas for  
390 pollinators' attention but the beneficial effect of facilitation between the the plant species also  
391 disappeared. Therefore, the importance of exaggerated UV reflectance in attracting pollinators from a  
392 range of several meters can be missed and/or mistakenly dismissed if not measured at the scale at which  
393 it has its strongest ecologically-relevant effect. Such a long-range signal might not be suspected  
394 considering the typical acuity range of bee chromatic vision for stationary stimuli within the confined space  
395 of a Y-maze (Giurfa et al., 1996). Overall, our results demonstrate that the functional role of UV reflectance  
396 signalling is contingent on the relative distance between deceptive and rewarding species and their  
397 pollinators; the distance described here operates at spatial scales of meters, which are much greater than  
398 previously described for floral colours. The terminal position of the outer petals on a long stemmed plant  
399 (Fig. 1a) likely promotes (wind) movement of this exaggerated UV signal that can be even better perceived  
400 from afar by foraging bees (Stojecev et al, 2011; Brock et al., 2016) by acting as a 'flag signal'.  
401 Contributing to a range of floral displays aimed at pollinator senses, UV reflectance acts as an important  
402 visual cue in many flowering plant species (Johnson & Andersson, 2002; Klomberg et al., 2019). The high  
403 UV reflectance of *Diuris* outer petals enables bees to find these relatively scarce flowers from a distance of  
404 meters. Selection may favour deceptive floral displays capable of longer range UV signalling that help  
405 pollinators such as solitary bees to locate flowers in habitats where the distribution of rewarding model  
406 flowers is patchy, explaining why relatively large, salient UV signals with high background contrast have  
407 evolved in the mimic (Rohde et al., 2013). By revealing that floral salient UV displays are efficiently used  
408 by bees not only at the very close ranges already well-documented, but also from further afield (see also  
409 Supporting information, Methods S2), we may explain how plant deception succeeds despite imperfect  
410 floral mimicry. This finding invite us to extend our understanding of the adaptive significance of UV



411 reflectance and salient signalling that plants display in an captivating phenomenon such as the floral  
412 mimicry and more general in nature.

413

414 **References**

- 415 Ackerman, J. D. (1986a). Mechanisms and evolution of food-deceptive pollination systems in orchids.  
416 *Lindleyana*, 1, 108-113. <https://doi.org/10.1017/S1464793105006986>
- 417 Ackerman, J. D. (1986b). Coping with the epiphytic existence: pollination strategies. *Selbyana*, 9, 52-60.
- 418 Briscoe, A., & Chittka, L. (2001). The evolution of colour vision in insects. *Annual Review of Entomology*, 46,  
419 471-510. <https://doi.org/10.1146/annurev.ento.46.1.471>
- 420 Brock, M. T., Lucas, L. K., Anderson, N. A., Rubin, M. J., Cody Markelz, R. J., Covington, M. F., Devisetty,  
421 U. K., Chapple, C., Maloof, J. N., & Weinig, C. (2016). Genetic architecture, biochemical  
422 underpinnings and ecological impact of floral UV patterning. *Molecular Ecology*, 25, 11, 22–1140.  
423 <https://doi.org/10.1111/mec.13542>
- 424 Burr, B., Rosen, D., & Barthlott, W. (1995). Untersuchungen zur Ultraviolettreflexion von  
425 Angiospermenblüten III. Dilleniidae und Asteridae. *Tropische und subtropische Pflanzenwelt*, 93, 1–  
426 175.
- 427 Chittka, L. 1992. The colour hexagon: a chromaticity diagram based on photoreceptor excitations as a  
428 generalized representation of colour opponency. *The Journal of Comparative Physiology A*, 170,  
429 533–543. <https://doi.org/10.1007/BF00199331>
- 430 Chittka, L., Shmida, A. V. I., Troje, N., & Menzel, R. (1994). Ultraviolet as a component of flower reflections,  
431 and the colour perception of Hymenoptera. *Vision Research*. 34(11), 1489-1508.  
432 [https://doi.org/10.1016/0042-6989\(94\)90151-1](https://doi.org/10.1016/0042-6989(94)90151-1)
- 433 Chittka, L., Spaethe, J., Schmidt, A., & Hickelsberger, A. (2001). Adaptation, constraint, and chance in the  
434 evolution of flower colour and pollinator colour vision in *Cognitive Ecology of Pollination*, L. Chittka,  
435 J. D. Thomson, Eds. Cambridge, UK: Cambridge Univ. Press.  
436 <https://doi.org/10.1017/CBO9780511542268.007>
- 437 Chittka, L., Dyer, A. G., Bock, F., & Dornhaus A. (2003). Bees trade off foraging speed for accuracy. *Nature*  
438 424(6947), 388-388. <https://doi.org/10.1038/424388a>
- 439 Chittka, L., & Kevan, P. G. (2005). Flower colour as advertisement in *Practical Pollination Biology*, A. Dafni,  
440 P. G. Kevan, B.C. Husband, Eds. Cambridge, ON, Canada: Enviroquest Ltd.
- 441 Cuthill, I. C. (2014). Evolution: the mystery of imperfect mimicry. *Current Biology*, 24(9), 364-366.  
442 <https://doi.org/10.1016/j.cub.2014.04.006>

- 443 Dafni, A. (1984). Mimicry and deception in pollination. *The Annual Review of Ecology, Evolution, and*  
444 *Systematics*, 15, 259–278. <https://doi.org/10.1146/annurev.es.15.110184.001355>
- 445 Daumer, K. (1956). Reizmetrische Untersuchung des Farbensehens der Bienen. *Zeitschrift für*  
446 *vergleichende Physiologie*, 38, 413–478. <https://doi.org/10.1007/BF00340456>
- 447 Daumer, K. (1958). Blumenfarben, wie sie die Bienen sehen. *Zeitschrift für vergleichende Physiologie*, 41,  
448 49–110. <https://doi.org/10.1007/BF00340242>
- 449 Dawkins, R., & Krebs, J. R. (1979). Arms races between and within species. *Proceedings of the Royal*  
450 *Society B: Biological Sciences*, 205, 489–511. <https://doi.org/10.1098/rspb.1979.0081>
- 451 Dinkel, T. & Lunau, K. (2001). How drone flies (*Eristalis tenax* L., Syrphidae, Diptera) use floral guides to  
452 locate food sources. *Journal of Insect Physiology*, 47, 1111–1118. [https://doi.org/10.1016/S0022-](https://doi.org/10.1016/S0022-1910(01)00080-4)  
453 [1910\(01\)00080-4](https://doi.org/10.1016/S0022-1910(01)00080-4)
- 454 Duffy, K. J. & Stout, J. C. (2011). Effects of conspecific and heterospecific floral density on the pollination of  
455 two related rewarding orchids. *Plant Ecology* 212(8), 1397-1406. [https://doi.org/10.1007/s11258-](https://doi.org/10.1007/s11258-011-9915-1)  
456 [011-9915-1](https://doi.org/10.1007/s11258-011-9915-1)
- 457 Duffy, K. J. & Johnson, S. D. (2017). Effects of distance from models on the fitness of floral mimics. *Plant*  
458 *Biology*, 19, 438–443. <https://doi.org/10.1111/plb.12555>
- 459 Dyer, A. G. (1996). Reflection of near-ultraviolet radiation from flowers of Australian native plants. *Australian*  
460 *Journal of Botany*, 44, 473-488. <https://doi.org/10.1071/BT9960473>
- 461 Dyer, A. G. & Chittka, L. (2004). Fine colour discrimination requires differential conditioning in bumblebees.  
462 *Die Naturwissenschaften*, 91, 224-227. <https://doi.org/10.1007/s00114-004-0508-x>
- 463 Dyer, A. G., & Neumeyer, C. (2005). Simultaneous and successive colour discrimination in the honeybee  
464 (*Apis mellifera*). *Journal of Comparative Physiology A*, 191, 547–557.  
465 <https://doi.org/10.1007/s00359-005-0622-z>
- 466 Dyer, A.G., Boyd-Gerny, S., McLoughlin, S., Rosa, M.G.P., Simonov, V., & Wong, B.B.M. (2012). Parallel  
467 evolution of angiosperm colour signals: common evolutionary pressures linked to hymenopteran  
468 vision. *Proceedings of the Royal Society B: Biological Sciences*, 279, 3606–3615.  
469 <https://doi.org/10.1007/s00359-016-1101-4>
- 470 Dyer, A.G., Boyd-Gerny, S., Shrestha, M., Garcia, J. E., van der Kooi, C., & Wong, B.B.M. (2019). Colour  
471 preferences of *Tetragonula carbonaria* Sm. stingless bees for colour morphs of the Australian native  
472 orchid *Caladenia carnea*. *Journal of Comparative Physiology A*, 205, 347–361.  
473 <https://doi.org/10.1007/s00359-016-1101-4>

- 474 Frieman, J. & Reilly, S. (2015). *Learning: A behavioral, cognitive, and evolutionary synthesis*. Thousand  
475 Oaks, CA: Sage Publications.
- 476 Garcia, J.E., Dyer, A.G., Burd, M., & Shrestha, M. (2001). Flower colour and size signals differ depending  
477 on geographical location and altitude region. *Plant Biology*, 23, 905-914.  
478 <https://doi.org/10.1111/plb.13326>
- 479 Gigord, L. D, Macnair, M. R., Stritesky, M., & Smithson, A. (2002). The potential for floral mimicry in  
480 rewardless orchids: an experimental study. *Proceedings of the Royal Society B: Biological Sciences*  
481 269(1498), 1389-1395. <https://doi.org/10.1098/rspb.2002.2018>
- 482 Giurfa, M., Vorobyev, M., Kevan, P., & Menzel, R. (1996). Detection of coloured stimuli by honeybees:  
483 minimum visual angles and receptor specific contrasts. *Journal of Comparative Physiology A*, 178,  
484 699–709. <https://doi.org/10.1007/BF00227381>
- 485 Giurfa, M. (2004). Conditioning procedure and colour discrimination in the honeybee *Apis mellifera*. *Die*  
486 *Naturwissenschaften*, 91, 228-231. <https://doi.org/10.1007/s00114-004-0530-z>
- 487 Glover, B. J. (2011). Pollinator attraction: The importance of looking good and smelling nice. *Current Biology*,  
488 21, R307–R309. <https://doi.org/10.1016/j.cub.2011.03.061>
- 489 Hammer, M. (1993). An identified neuron mediates the unconditioned stimulus in associative olfactory  
490 learning in honeybees. *Nature*, 366, 59–63. <https://doi.org/10.1038/366059a0>
- 491 von Helversen, O. (1972). *Information Processing in the Visual Systems of Anthropods*, Symposium Held at  
492 the Department of Zoology, University of Zurich, R. Wehner. New York, US: Springer Publishing.
- 493 Horth, L., Campbell, L., and Bray, R. (2014). Wild bees preferentially visit *Rudbeckia* flower heads with  
494 exaggerated ultraviolet absorbing floral guides. *Biology Open*, 3, 221–230.  
495 <https://doi.org/10.1242/bio.20146445>
- 496 Jersáková, J., Johnson, S. D., & Kindlmann, P. (2006). Mechanisms and evolution of deceptive pollination  
497 in orchids. *Biological Reviews*, 81(2), 219-235. <https://doi.org/10.1017/S1464793105006986>
- 498 Jersáková, J., Jürgens, A., Šmilauer, P., & Johnson S. D. (2012). The evolution of floral mimicry: identifying  
499 traits that visually attract pollinators. *Functional Ecology*, 26(6), 1381-1389.  
500 <https://doi.org/10.1111/j.1365-2435.2012.02059.x>
- 501 Johnson, S. D., & Andersson, S. (2002). A simple field method for manipulating ultraviolet reflectance of  
502 flowers. *Canadian Journal of Botany*, 80, 1325–1328. <https://doi.org/10.1139/b02-116>

- 503 Johnson, S. D., Peter, C. I., Nilsson, L., & Agren, A.J. (2003). Pollination success in a deceptive orchid is  
504 enhanced by co-occurring rewarding magnet plants. *Ecology*, *84*, 2919–2927.  
505 <https://doi.org/10.1890/02-0471>
- 506 Johnson, S. D., & Morita, S. (2006). Lying to Pinocchio: floral deception in an orchid pollinated by long-  
507 proboscid flies. *Botanical Journal of the Linnean Society*, *152*(3), 271-278.  
508 <https://doi.org/10.1111/j.1095-8339.2006.00571.x>
- 509 Johnson, S. D., & Schiestl, F. P. (2016). *Floral mimicr*. Oxford, UK: Oxford University Press.
- 510 Julliet, N., Gonzales, M. A., Page, P. A., & Gigord, L. D. B. (2007). Pollination of the European food-deceptive  
511 *Traunsteinera globosa* (Orchidaceae): the importance of nectar-producing neighbouring plants.  
512 *Plant Systematics and Evolution*, *265*, 123–129. <https://doi.org/10.1007/s00606-006-0507-9>
- 513 Johnson, S. D., Morita, S. Lying to Pinocchio: floral deception in an orchid pollinated by long-proboscid flies.  
514 *Botanical Journal of the Linnean Society*, *152*(3), 271-278 (2006). [https://doi.org/10.1111/j.1095-](https://doi.org/10.1111/j.1095-8339.2006.00571.x)  
515 [8339.2006.00571.x](https://doi.org/10.1111/j.1095-8339.2006.00571.x)
- 516 Kazemi, B., Gamberale-Stille, G., Tullberg, B. S., & Leimar, O. (2014). Stimulus salience as an explanation  
517 for imperfect mimicry. *Current Biology*, *24*(9), 965-969. <https://doi.org/10.1016/j.cub.2014.02.061>
- 518 Klomberg, Y., Dywou Kouede, R., Bartoš, M., Mertens, J. E., Tropek, R., Fokam, E. B., & Janeček, Š. (2019).  
519 The role of ultraviolet reflectance and pattern in the pollination system of *Hypoxis camerooniana*  
520 (Hypoxidaceae). *AoB Plants*, *11*(5), plz057. <https://doi.org/10.1093/aobpla/plz057>
- 521 van Der Kooi, C.J., Dyer, A.G., Kevan, P.G., & Lunau, K. (2019). Functional significance of the optical  
522 properties of flowers for visual signalling. *Annals of Botany*, *123*, 263–276.  
523 <https://doi.org/10.1093/aob/mcy119>
- 524 Koski, M. H., & Ashman, T. L. (2014). Dissecting pollinator responses to a ubiquitous ultraviolet floral pattern  
525 in the wild. *Functional Ecology*, *28*, 868–877. <https://doi.org/10.1111/1365-2435.12242>
- 526 Kulahci, I. G., Dornhaus, A., & Papaj D. R. (2008). Multimodal signals enhance decision making in foraging  
527 bumble-bees. *Proceedings: Biological Sciences*, *275*, 797–802.  
528 <http://www.jstor.org/stable/25249577>
- 529 Leonard, A. S., Dornhaus, A., & Papaj, D. R. Forget-me-not: Complex floral displays, inter-signal  
530 interactions, and pollinator cognition. *Current Zoology*, *57*, 215–224 (2011)a.  
531 <https://doi.org/10.1098/rspb.2007.1176>

- 532 Leonard, A. S., Dornhaus, A., & Papaj, D. R. Flowers help bees cope with uncertainty: signal detection and  
533 the function of floral complexity. *Journal of Experimental Biology*, 214, 113–121 (2011)b.  
534 <https://doi.org/10.1098/rspb.2007.1176>
- 535 Lunau, K., Fieselmann, G., Heuschen, B., & Van De Loo A. (2006). Visual targeting of components of floral  
536 colour patterns in flower-naïve bumblebees (*Bombus terrestris*; Apidae). *Naturwissenschaften* 93,  
537 325–328. <https://doi.org/10.1007/s00114-006-0105-2>
- 538 Lunau, K., Scaccabarozzi, D., Willing, L., & Dixon, K.W. (2021). A bee's eye view of remarkable floral colour  
539 patterns in the Southwest Australian biodiversity hotspot revealed by false colour photography.  
540 *Annals of Botany*, 128, 821–834. <https://doi.org/10.1093/aob/mcab088>
- 541 Lynn, S. K., Cnaani, J., Papaj, D. R., & Björklund, M. (2005). Peak shift discrimination learning as a  
542 mechanism of signal evolution. *Evolution*, 59, 1300–1305. [https://doi.org/10.1111/j.0014-](https://doi.org/10.1111/j.0014-3820.2005.tb01780.x)  
543 [3820.2005.tb01780.x](https://doi.org/10.1111/j.0014-3820.2005.tb01780.x)
- 544 Martínez-Harms, J., Márque, N., Menzel, R., & Vorobyev, M. (2014). Visual generalization in honeybees:  
545 evidence of peak shift in colour discrimination. *Journal of Comparative Physiology A*, 200, 317–325.  
546 <https://doi.org/10.1007/s00359-014-0887-1>
- 547 Morawetz, L., Svoboda, A., Spaethe, J., & Dyer, A.G. (2013). Blue colour preference in honeybees distracts  
548 visual attention for learning closed shapes. *Journal of Comparative Physiology A*, 199, 817–827.  
549 <https://doi.org/10.1007/s00359-013-0843-5>
- 550 Naug, D., & Arathi, H.S. (2007). Receiver bias for exaggerated signals in honeybees and its implications for  
551 the evolution of floral displays. *Biology Letters*, 3, 635–637. <https://doi.org/10.1098/rsbl.2007.0436>
- 552 Orbán, L. L., & Plowright, C.M.S. (2014). Getting to the start line: how bumblebees and honeybees are  
553 visually guided towards their first floral contact. *Insectes Sociaux*, 61, 325–336.  
554 <https://doi.org/10.1007/s00040-014-0366-2>
- 555 Papiorek, S., Junker, R.R., Alves-dos-Santos, I., Melo, G.A.R., Amaral-Neto, L.P., Sazima, M., Wolowski,  
556 M., Freitas, L., & Lunau K. (2016). Bees, birds and yellow flowers: Pollinator-dependent convergent  
557 evolution of UV patterns. *Plant Biology*, 18, 46–55. <https://doi.org/10.1111/plb.12322>
- 558 Peitsch, D., Fietz, A., Hertel, H., de Souza, J., Ventura, D.F., & Menzel, R. (1992). The spectral input systems  
559 of hymenopteran insects and their receptor-based colour vision. *Journal of Comparative Physiology*  
560 *A*, 170, 23–40. <https://doi.org/10.1007/BF00190398>
- 561 Perry, C. J., & Barron, A. B. (2013). Neural mechanisms of rereferences ward in insects. *Annual Review of*  
562 *Entomology*, 58, 543–562. <https://doi.org/10.3758/s13415-020-00842-0>

- 563 Peter, C. I., & Johnson, S. D. (2008). Mimics and magnets: the importance of color and ecological facilitation  
564 in floral deception. *Ecology*, 89(6), 1583-1595. <http://hdl.handle.net/10962/d1005977>
- 565 Peter, C. I., & Johnson, S. D. (2013). Generalized food deception: colour signals and efficient pollen transfer  
566 in bee-pollinated species of *Eulophia* (Orchidaceae). *Botanical Journal of the Linnean Society*,  
567 171(4), 713-729. <https://doi.org/10.1111/boj.12028>
- 568 Renner, S. S. (2006). Rewardless flowers in the angiosperms and the role of insect cognition in their  
569 evolution in *Plant-pollinator interactions: from specialization to generalization*. Oxford, UK: Oxford  
570 University Press, pp. 123-144.
- 571 Rohde, K., Papiorek, S., & Lunau, K. (2013). Bumblebees (*Bombus terrestris*) and honeybees (*Apis*  
572 *mellifera*) prefer similar colours of higher spectral purity over trained colours. *Journal of Comparative*  
573 *Physiology A*, 199, 197-210. <https://doi.org/10.1007/s00359-012-0783-5>
- 574 Roy, B. & Widmer, A. (1999). Floral mimicry: A fascinating yet poorly understood phenomenon. *Trends*  
575 *Plant Science*, 4, 325–330.
- 576 Scaccabarozzi, D., Cozzolino, S., Guzzetti, L., Galimberti, A., Milne, L., Dixon, K. W., & Phillips, R.D. (2018).  
577 Masquerading as pea plants: behavioural and morphological evidence for mimicry of multiple  
578 models in an Australian orchid. *Annals of Botany*, 122, 1061–1073.  
579 <https://doi.org/10.1093/aob/mcy166>
- 580 Schaefer, H.M., & Ruxton, G.D. (2009). Deception in plants: mimicry or perceptual exploitation? *Trends in*  
581 *Ecology & Evolution*, 24, 676–685. <https://doi.org/10.1016/j.tree.2009.06.006>
- 582 F. P. Schiestl, On the success of a swindle: Pollination by deception in orchids. (2005).  
583 *Naturwissenschaften*, 92, 255–264. <https://doi.org/10.1007/s00114-005-0636-y>
- 584 Schiestl, F.P., & Johnson, S.D. (2013). Pollinator-mediated evolution of floral signals. *Trends in Ecology &*  
585 *Evolution*, 28, 307-315. <https://doi.org/10.1016/j.tree.2013.01.019>
- 586 Shrestha, M., Dyer, A. G., Dorin, A., Ren, Z. X., & Burd, M. (2020). Rewardlessness in orchids: how frequent  
587 and how rewardless?. *Plant Biology*, 22(4), 555-561. <https://doi.org/10.1111/plb.13113>
- 588 Skorupski P., & Chittka L. (2010). Differences in photoreceptor processing speed for chromatic and  
589 achromatic vision in the bumblebee, *Bombus terrestris*. *The Journal of Neuroscience*, 30, 3896–  
590 3903. <https://doi.org/10.1523/JNEUROSCI.5700-09.2010>
- 591 Spaethe, J., Tautz, J., & Chittka, L. (2001). Visual constraints in foraging bumble bees: flower size and colour  
592 affect search time and flight behavior. *Proceedings of the National Academy of Sciences of the*  
593 *United States of America*, 98, 3898-3903. <https://doi.org/10.1073/pnas.071053098>

- 594 Srinivasan, M. & Lehrer, M. (1985). Temporal resolution of colour vision in the honeybee *Journal of*  
595 *Comparative Physiology A*, 157(5), 579-586. <https://doi.org/10.1007/BF01351352>
- 596 Stojcev, M., Radtke, N., D'Amaro, D., Dyer, A.G. & Neumeyer, C. (2011). General principles in motion vision:  
597 colour-blindness of object motion depends on pattern velocity in honeybee and goldfish. *Visual*  
598 *Neuroscience*, 28, 361-370. <https://doi.org/10.1017/S0952523811000101>
- 599 Uchikawa K., & Ikeda, M. (1981). Temporal deterioration of wavelength discrimination with successive  
600 comparison method. *Vision Research*, 21, 591–595. [https://doi.org/10.1016/0042-6989\(81\)90106-1](https://doi.org/10.1016/0042-6989(81)90106-1)
- 601 Vereecken, N. J. & Schiestl, F. P. (2008). The evolution of imperfect floral mimicry. *Proceedings of the*  
602 *National Academy of Sciences of the United States of America*, 105(21), 7484-7488.  
603 <https://doi.org/10.1073/pnas.0800194105>
- 604 Zhang, S.W., Srinivasan, M.V., & Collett, T. (1995). Convergent processing in honeybee vision: multiple  
605 channels for the recognition of shape. *Proceedings of the National Academy of Sciences of the*  
606 *United States of America*, 92, 3029–3031. <https://doi.org/10.1073/pnas.92.7.3029>



**Tables**

**Table 1.** Average of excitation values ( $\pm$  SD: standard deviation) of bee photoreceptors (UV, blue, green) according to Chittka<sup>46,47</sup> and relative corrected values for *Diuris* and *Daviesia* flower components as shown in Fig. 1, including *Diuris* outer petals treated by UV filter. Excitation values range between 0 and 1.0 where a value of 0.5 represents no excitation of the sensory neural channel, and so absolute maximum excitation contrast is 0.5 for each respective channel.

| Flower components |                                                           | E(uv) $\pm$ SD  | E(uv)-0.5 | E(b) $\pm$ SD   | E(b)-0.5 | E(g) $\pm$ SD   | E(g)-0.5 |
|-------------------|-----------------------------------------------------------|-----------------|-----------|-----------------|----------|-----------------|----------|
| 1                 | <i>Diuris brumalis</i> outer petal                        | 0.84 $\pm$ 0.03 | 0.34      | 0.49 $\pm$ 0.07 | 0.01     | 0.70 $\pm$ 0.03 | 0.20     |
|                   | <i>Diuris brumalis</i> outer petal treated with UV filter | 0.48 $\pm$ 0.03 | 0.02      | 0.32 $\pm$ 0.07 | 0.18     | 0.70 $\pm$ 0.03 | 0.20     |
| 2                 | <i>Diuris brumalis</i> dorsal sepal                       | 0.77 $\pm$ 0.09 | 0.27      | 0.40 $\pm$ 0.09 | 0.10     | 0.57 $\pm$ 0.07 | 0.07     |
| 3                 | <i>Diuris brumalis</i> lateral labellum lobe              | 0.64 $\pm$ 0.17 | 0.14      | 0.20 $\pm$ 0.11 | 0.30     | 0.42 $\pm$ 0.17 | 0.08     |
| 4                 | <i>Diuris brumalis</i> labellum                           | 0.25 $\pm$ 0.17 | 0.25      | 0.07 $\pm$ 0.07 | 0.43     | 0.15 $\pm$ 0.03 | 0.35     |
| 5                 | <i>Daviesia decurrens</i> standard petal                  | 0.77 $\pm$ 0.02 | 0.27      | 0.39 $\pm$ 0.09 | 0.11     | 0.45 $\pm$ 0.06 | 0.05     |
| 6                 | <i>Daviesia decurrens</i> wing petal                      | 0.56 $\pm$ 0.10 | 0.06      | 0.13 $\pm$ 0.05 | 0.37     | 0.14 $\pm$ 0.06 | 0.36     |
